# Supplementary material for: Synthesis of carbon tubes with mesoporous wall structure using designed silica tubes as templatesElectronic supplementary information (ESI) available: TEM image of a carbon tube showing disordered mesoporous walls. See http://www.rsc.org/suppdata/cc/b2/b212336c/
Source: Royal Society of Chemistry journal article supplement (doi:10.1039/b212336c), 2003-02-10
Supplement: b212336c.pdf [file b212336c.pdf]

**Supplementary Information for;**

## **Synthesis of carbon tubes with mesoporous wall structure using designed silica tubes as templates**

**Minsuk Kim, Kwonnam Sohn and Taeghwan Hyeon\***

National Creative Research Initiative Center for Oxide Nanocrystalline Materials and School of Chemical Engineering, Seoul National University, Seoul 151-744, Korea; E-mail: [thyeon@plaza.snu.ac.kr](mailto:thyeon@plaza.snu.ac.kr)

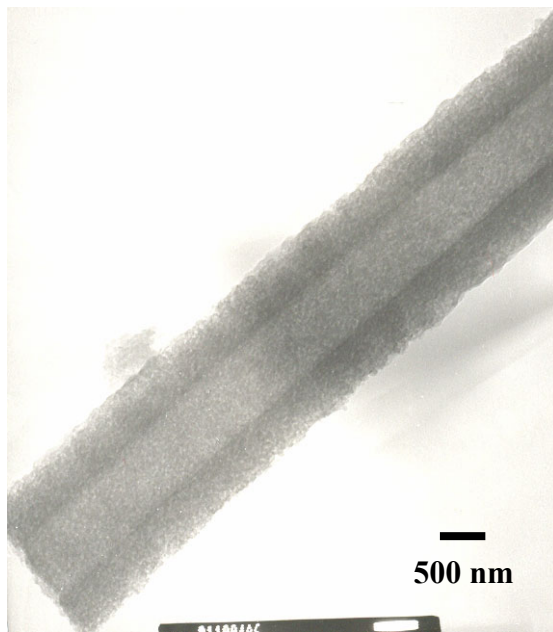

**Fig. S1** TEM image of carbon tube showing disordered mesoporous walls.
